# Supplementary material
Source: bioRxiv or medRxiv preprint supplement (http://biorxiv.org/highwire/filestream/35640/field_highwire_adjunct_files/0/121491-1.pdf)
Supplement: Supplementary file [file 121491-1.pdf]

S1. Structural equation model used to evaluate the effect of network indices on plant community diversity. Hexagons represent composite variables.

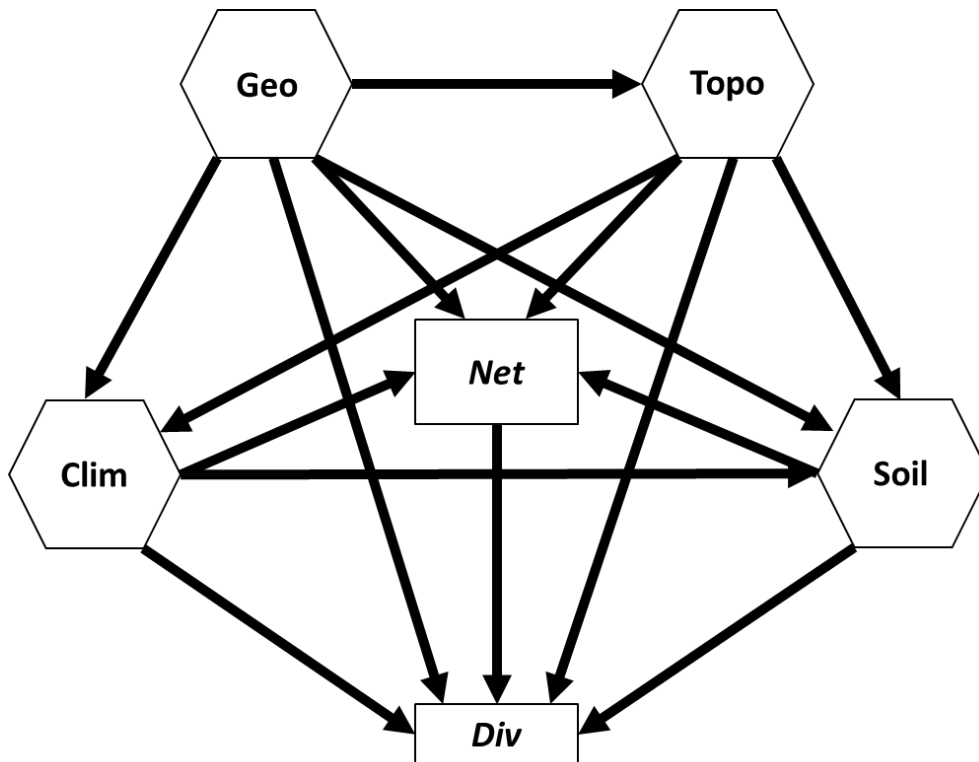

Explanation of the variables in the SEM. For composite variables the number in parentheses represents the unit of the variable. For measure variables the number in parentheses represents the abbreviation of the variable.

| Variable (SEM) | Type of variable | Variable                                                   | Description                                                                               |
|----------------|------------------|------------------------------------------------------------|-------------------------------------------------------------------------------------------|
| Geo            | Composite        | Latitude ( $^{\circ}$ )                                    | Latitude in decimal system                                                                |
|                |                  | Longitude ( $^{\circ}$ )                                   | Longitude in decimal system (includes both the sin and cosin transformation of longitude) |
| Topo           | Composite        | Elevation (m)                                              | Altitude over sea level                                                                   |
|                |                  | Slope ( $^{\circ}$ )                                       | Slope                                                                                     |
| Clim           | Composite        | Aridity                                                    | 1 – Aridity Index (Precipitation / Evapotranspiration)                                    |
|                |                  | Seasonality (%)                                            | Coefficient of variation of monthly precipitation for 30 years                            |
| Soil           | Composite        | Soil organic C (%)                                         | Proportion of organic C in bare soil                                                      |
|                |                  | pH                                                         | Bare soil pH                                                                              |
|                |                  | Total phosphorous ( $\text{mg}_P/\text{g}_{\text{soil}}$ ) | Available P in bare soil                                                                  |
| Net            | Measure          | Link Density ( $D$ )                                       | Average number of links per node                                                          |
|                |                  | Link weight mean ( $\bar{W}$ )                             | Average of link weights in the network                                                    |
|                |                  | Link weight heterogeneity ( $H$ )                          | Kurtosis of link weights in the network                                                   |
|                |                  | Global network balance ( $K$ )                             | Proportion of balanced cycles in the network                                              |
| Div            | Measure          | Species richness ( $SR$ )                                  | Total number of perennial plant species                                                   |
|                |                  | Species evenness ( $E$ )                                   | Standardized Shannon diversity index ( $H'/\text{Ln}(SR)$ )                               |
